# Supplementary material
Source: Research Square preprint supplement (doi:10.21203/rs.3.rs-10082897/v1)
Supplement: Supplementary file 1 [file 07eb405b014d88f2d33e0c12.docx]

**Table 1:  Demographics**

| **Demographics** | **Any Maternal DM**  **N=61 (15.8%)** | **No Maternal DM**  **N=326 (84.2%)** |
| --- | --- | --- |
| **BW (meanSD)**  **BW %ile (meanSD)*** | 60 | 1580.8  51.1 |
| **GA weeks (meanSD)** | 31.3 | 31.2 |
| **Sex**   - Male - Female | 39 (64%)  22 (36%) | 175 (54%)  151 (46%) |
| **Inborn** | 58 (95%) | 296 (91%) |
| **Mode of delivery**  Vaginal  C/S** | 14 (23%)  46 (77%) | 122 (37.5%)  203 (62.5%) |
| **Antenatal steroids**  **(Any)** | 55 (90%) | 280 (86%) |
| **BMI^ (median (IQR))** | 31.8 (24.6,38.4) | 27.6 (22.2, 33.4) |
| **Obesity*****  **( BMI³30)**   - Type1 - Type2 - GDM | 35 (59%)  2 (18%)  12 (71%)  21 (63%) | 130 (41%) |
| **Type of DM**   - Type1 - Type2 - GDM | 11 (18%)  16 (26%)  34 (56%) | n/a |
| **HbA1c obtained** | 43 (70%) | 87 (27%) |
| **Hgb A1c** | 6.0 | 5.5 |
| **Maternal race**   - AA - Caucasian - Asian American - Multiracial - Not specified | 18 (29.5%)  37 (60.7%)  3 (5%)  0  3 (5%) | 168 (51.5%)  136 (41.7%)  0  2 (0.6%)  18 (5.5%) |
| Data are presented as n (%) or median (IQR).  Birth weight, BW; Gestational age, GA; Caesarean section, C/S  *P <0.01, t-test, **P=0.01, by Fisher’s exact test, ***P<0.01 Chi-squared test;  ^P<0.01 by Wilcoxon rank sum test | | |
