# Supplementary material
Source: Research Square preprint supplement (doi:10.21203/rs.3.rs-10082897/v1)
Supplement: Supplementary file 2 [file 09c9dcde8e7377f063bb132c.docx]

| **Table 2: Respiratory Outcomes** | Any Maternal DM  (n=61) | No Maternal DM  (n=326) |
| --- | --- | --- |
| RDS (VON definition)a | 39 (64%) | 214 (66%) |
| Surfactant   - Not given - Received * - Given via ETT - Given via LISA | 33 (54%)  28 (46%)  21 (34%)  7 (11%) | 214 (65%)  112 (34%)  80 (25%)  32 (10%) |
| Peak FiO2**  (median (IQR)) | 25% (21,35) | 21% (21,30) |
| FiO2 at 24h^  (median (IQR)) | 21% (21,23) | 21% (21,21) |
| Days to 21% FiO2**  (Median (IQR)) | 1 (0,6) | 0 (0,4) |
| Max Respiratory support (4-24 hours)  -CPAP or higher  -Mechanical ventilation^ | 58 (95%)  24 (38%) | 306 (94%)  86 (26%) |
| Days spent on positive pressure^  (CPAP or higher)  (Median (IQR)) | 5 (2,9) | 3 (1,8) |
| *Data are presented as n (%) or median (IQR). RDS, respiratory distress syndrome; CPAP, continuous positive pressure, ETT, endotracheal tube; LISA, less invasive surfactant administration; RS, respiratory support; MV, mechanical ventilation*  *VON, Vermont Oxford Network; a need for supplemental oxygen and characteristics x-ray findings <24 hours of age*  **p <0.1, by Fisher’s exact test, **p <0.05, by Wilcoxon rank sum test, ^ p <0.1, by Wilcoxon rank sum test* | | |
